# Supplementary material
Source: PubMed Central journal article supplement (PMC3613918)
Supplement: JCI65579sd.pdf [file JCI65579sd.pdf]

# Supplementary Figure 1

CD22

IgG4

Healthy human skin

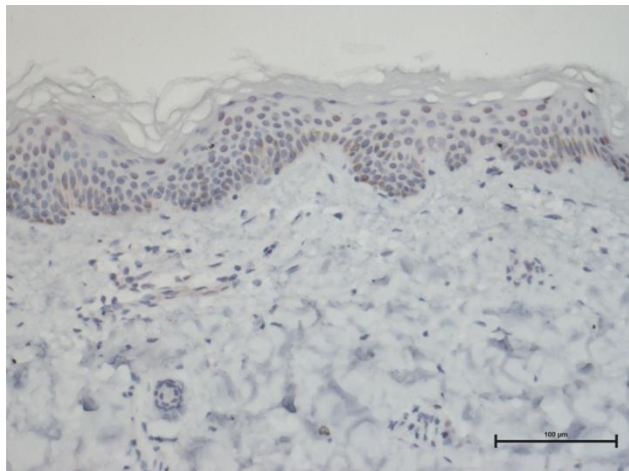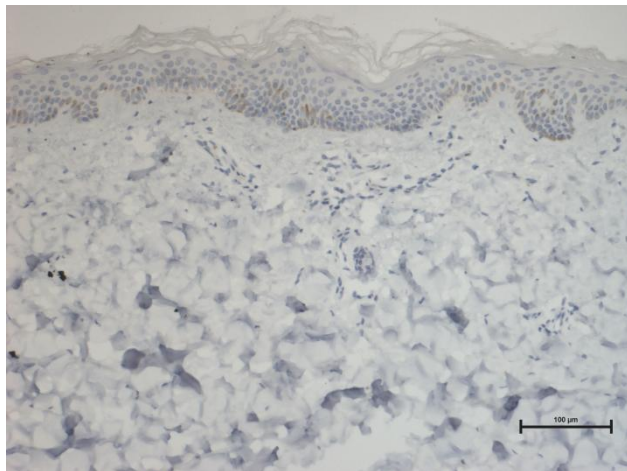

Primary melanoma

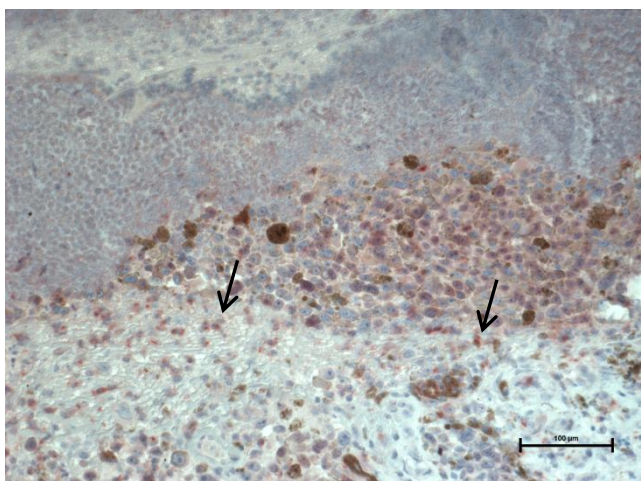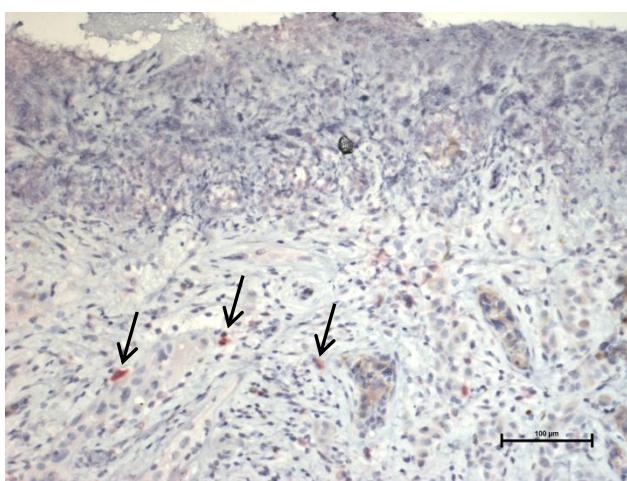

Metastatic melanoma

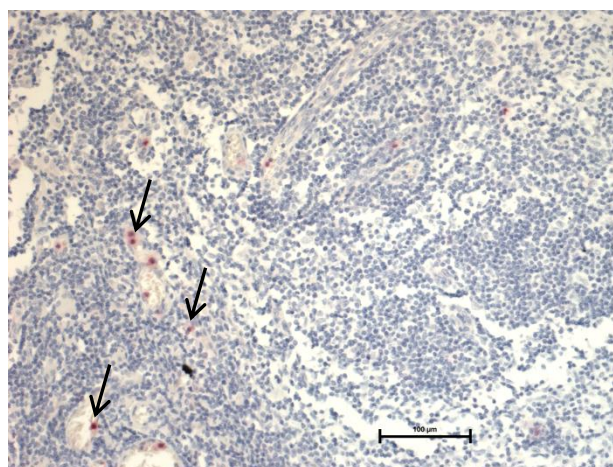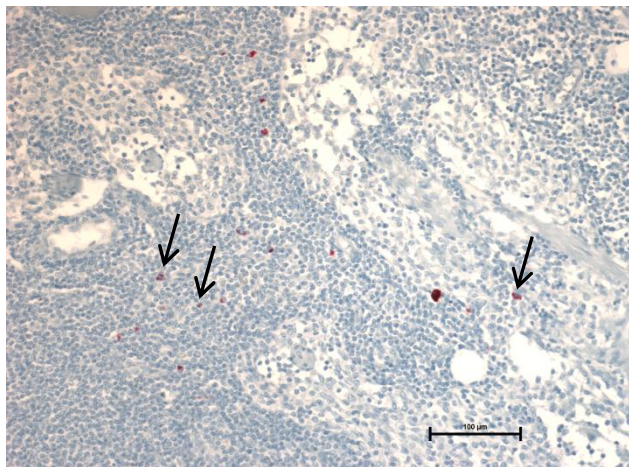

**Supplementary Figure 1:** Immunohistochemical analysis of CD22+ (left) and IgG4 (right), cells (shown in red and indicated by arrows) in healthy skin, primary and metastatic melanoma lesions. Counterstaining in hematoxylin (blue; Scale bar: 100 μm, magnification 10x).

# Supplementary Figure 2

**A**

```

----- FR-1 ----- CDR-1 -----
GAGGTGAGCTGGTGGAGTCTGGGGAGGCTGGTACAGCCTGGGGGTCCTCAGACTCCTCTGTGTGACGCTTGGATTCACTTTAGCATCTATGCCATGAGCTGGG

----- FR-2 ----- CDR-2 -----
TCCGCCAGGCTCCAGGAAAGGGCTGGAGTGGTCTCAACTATTAGTGGTAGTGGTGAATAGCACATATACGGACACTCCCGTGAAGGGCCGGTTCACCATCTCCAGAGA

----- FR-3 ----- CDR-3 -----
CAAACTCCAAGAACACCGCTGTATTGGCAAATGCAACAGCCTGAGAACTGAGACACGGCTGTGTATTACTGTGCGAAAAGGGACACTGGCTACGAAAGGGCGGTATGGACGTC

----- FR-4 -----
TGGGGCAAGGACCAACGGTCCACCGTCTCCTCA

```

**B**

|        |            |            |            |            |            |            |            |            |            |            |            |            |            |            |            |            |            |            |            |            |            |            |            |            |            |            |            |            |
|--------|------------|------------|------------|------------|------------|------------|------------|------------|------------|------------|------------|------------|------------|------------|------------|------------|------------|------------|------------|------------|------------|------------|------------|------------|------------|------------|------------|------------|
|        | <b>GCC</b> | <b>TCC</b> | <b>ACC</b> | <b>AAG</b> | <b>GGC</b> | <b>CCA</b> | <b>TCC</b> | <b>GTC</b> | <b>TTC</b> | <b>CCC</b> | <b>CTG</b> | <b>CGC</b> | <b>CCC</b> | <b>TGC</b> | <b>TCC</b> | <b>AGG</b> | <b>AGC</b> | <b>ACC</b> | <b>TCC</b> | <b>GAG</b> | <b>AGC</b> | <b>ACA</b> | <b>GCC</b> | <b>GCC</b> | <b>CTG</b> | <b>GGC</b> | <b>TGC</b> |            |
| M173   | A          | S          | T          | K          | G          | P          | S          | V          | F          | P          | L          | A          | P          | C          | S          | R          | S          | T          | S          | E          | S          | T          | A          | A          | L          | G          | C          |            |
| K01316 | -          | -          | -          | -          | -          | -          | -          | -          | -          | -          | -          | -          | -          | -          | -          | -          | -          | -          | -          | -          | -          | -          | -          | -          | -          | -          | -          |            |
| P01861 | -          | -          | -          | -          | -          | -          | -          | -          | -          | -          | -          | -          | -          | -          | -          | -          | -          | -          | -          | -          | -          | -          | -          | -          | -          | -          | -          |            |
|        | <b>CTG</b> | <b>GTC</b> | <b>AAG</b> | <b>GAC</b> | <b>TAC</b> | <b>TTC</b> | <b>CCC</b> | <b>GAA</b> | <b>CCG</b> | <b>GTG</b> | <b>ACG</b> | <b>GTG</b> | <b>TGG</b> | <b>TGC</b> | <b>TGG</b> | <b>AAC</b> | <b>TCA</b> | <b>GGC</b> | <b>GCC</b> | <b>CTG</b> | <b>ACC</b> | <b>AGC</b> | <b>GGC</b> | <b>GTG</b> | <b>CAC</b> | <b>ACC</b> | <b>TTC</b> | <b>CCG</b> |
| M173   | L          | V          | K          | D          | Y          | F          | P          | I          | P          | V          | T          | V          | S          | W          | N          | S          | G          | A          | L          | T          | S          | G          | V          | H          | T          | F          | P          |            |
| K01316 | -          | -          | -          | -          | -          | -          | -          | -          | -          | -          | -          | -          | -          | -          | -          | -          | -          | -          | -          | -          | -          | -          | -          | -          | -          | -          | -          |            |
| P01861 | -          | -          | -          | -          | -          | -          | -          | -          | -          | -          | -          | -          | -          | -          | -          | -          | -          | -          | -          | -          | -          | -          | -          | -          | -          | -          | -          |            |
|        | <b>GCT</b> | <b>GTC</b> | <b>CIT</b> | <b>CAG</b> | <b>TCC</b> | <b>TCA</b> | <b>GGA</b> | <b>CTC</b> | <b>TAC</b> | <b>TCC</b> | <b>CTC</b> | <b>AGC</b> | <b>AGC</b> | <b>GTG</b> | <b>GTG</b> | <b>ACC</b> | <b>GTG</b> | <b>CCC</b> | <b>TCC</b> | <b>AGC</b> | <b>AGC</b> | <b>TTC</b> | <b>GGC</b> | <b>ACC</b> | <b>CAG</b> | <b>ACC</b> | <b>TAC</b> |            |
| M173   | A          | V          | L          | Q          | S          | S          | G          | L          | Y          | S          | L          | S          | S          | V          | T          | V          | V          | P          | S          | S          | S          | L          | G          | T          | Q          | T          | Y          |            |
| K01316 | -          | -          | -          | -          | -          | -          | -          | -          | -          | -          | -          | -          | -          | -          | -          | -          | -          | -          | -          | -          | -          | -          | -          | -          | -          | -          | -          |            |
| P01861 | -          | -          | -          | -          | -          | -          | -          | -          | -          | -          | -          | -          | -          | -          | -          | -          | -          | -          | -          | -          | -          | -          | -          | -          | -          | -          | -          |            |
|        | <b>ATC</b> | <b>TGC</b> | <b>AAC</b> | <b>GTG</b> | <b>AAT</b> | <b>CAC</b> | <b>AAG</b> | <b>CCC</b> | <b>AGC</b> | <b>AAC</b> | <b>ACC</b> | <b>AAG</b> | <b>GTG</b> | <b>GAC</b> | <b>AAG</b> | <b>AGA</b> | <b>GTT</b> |            |            |            |            |            |            |            |            |            |            |            |
| M173   | I          | C          | N          | V          | N          | H          | K          | P          | S          | N          | T          | K          | V          | D          | K          | R          | V          |            |            |            |            |            |            |            |            |            |            |            |
| K01316 | T          | -          | -          | -          | -          | -          | -          | -          | -          | -          | -          | -          | -          | -          | -          | -          | -          |            |            |            |            |            |            |            |            |            |            |            |
| P01861 | T          | -          | -          | -          | -          | -          | -          | -          | -          | -          | -          | -          | -          | -          | -          | -          | -          |            |            |            |            |            |            |            |            |            |            |            |

**Supplementary Figure 2: V<sub>H</sub>-D-J (A)** and alignment of  $\gamma 4$  constant region **(B)** amplified by RT-PCR from a melanoma patient (M173) indicating that the acquired protein sequence has the highest similarity with IGHG4 (Accession P01861;K01316) analysed using Blast/Uniprot (<http://www.uniprot.org/blast/uniprot>).

# Supplementary Figure 3

**A**

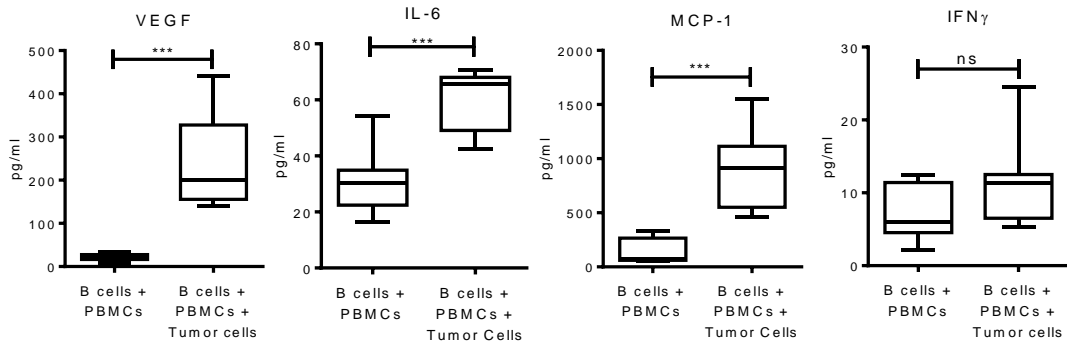

**B**

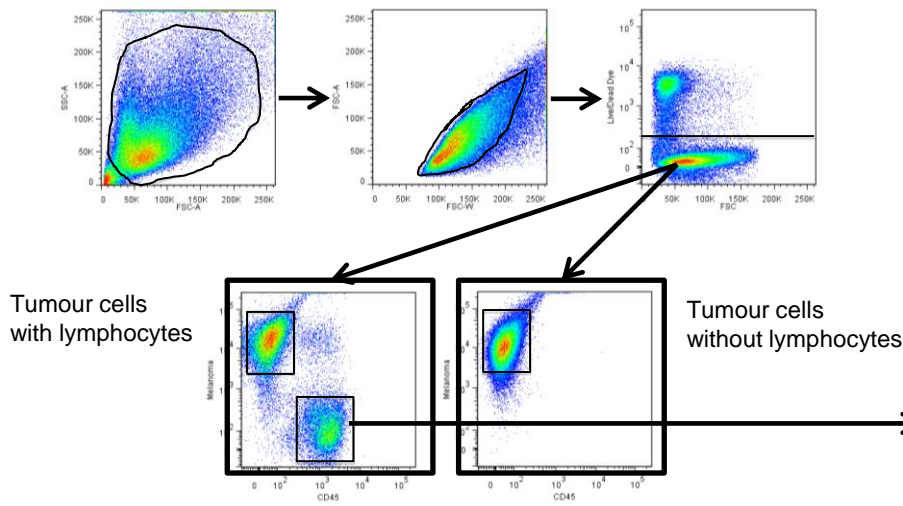

**C**

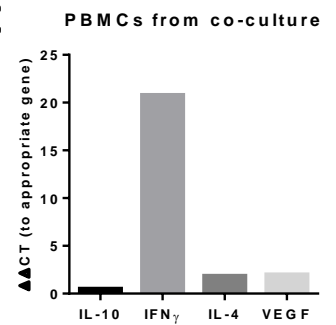

**D**

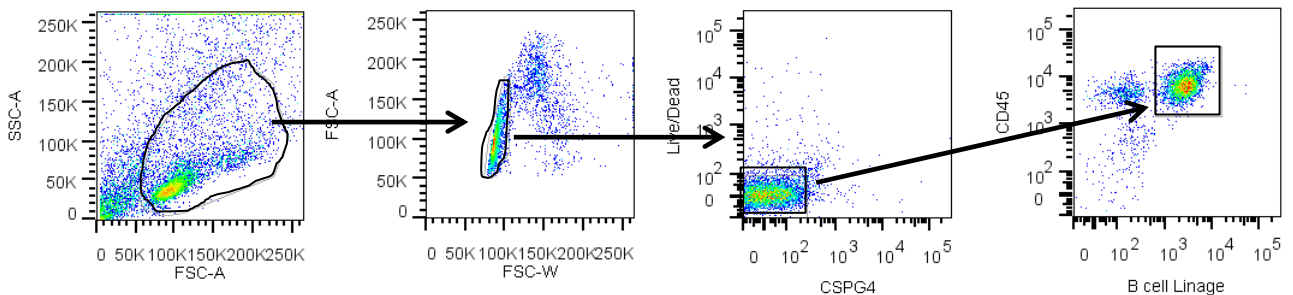

**Supplementary Figure 3: (A)** Cytokines secreted in culture supernatants of B cells and PBMCs stimulated with or without A375 melanoma tumour cells were analysed by Luminex bead array analysis. Titres of VEGF, IL-6 and MCP-1, but not of IFN $\gamma$ , were significantly increased in cultures treated with tumour cells (\*\*\*)  $P < 0.001$ ; ns = not significant  $P > 0.05$ , analysed by using Mann-Whitney-U-test,  $n=9$ ). **(B)** Flow cytometric sorting strategy to isolate A375 tumor cells and PBMCs from co-culture experiments; purified cells were used to examine cytokine expression in Figure 3D and expression of cytokines by PBMC in these cultures is depicted in **(C)**. **(D)** Flow cytometric sorting strategy to isolate B cells from co-culture experiments described in Figure 3F.



## Supplementary Figure 4

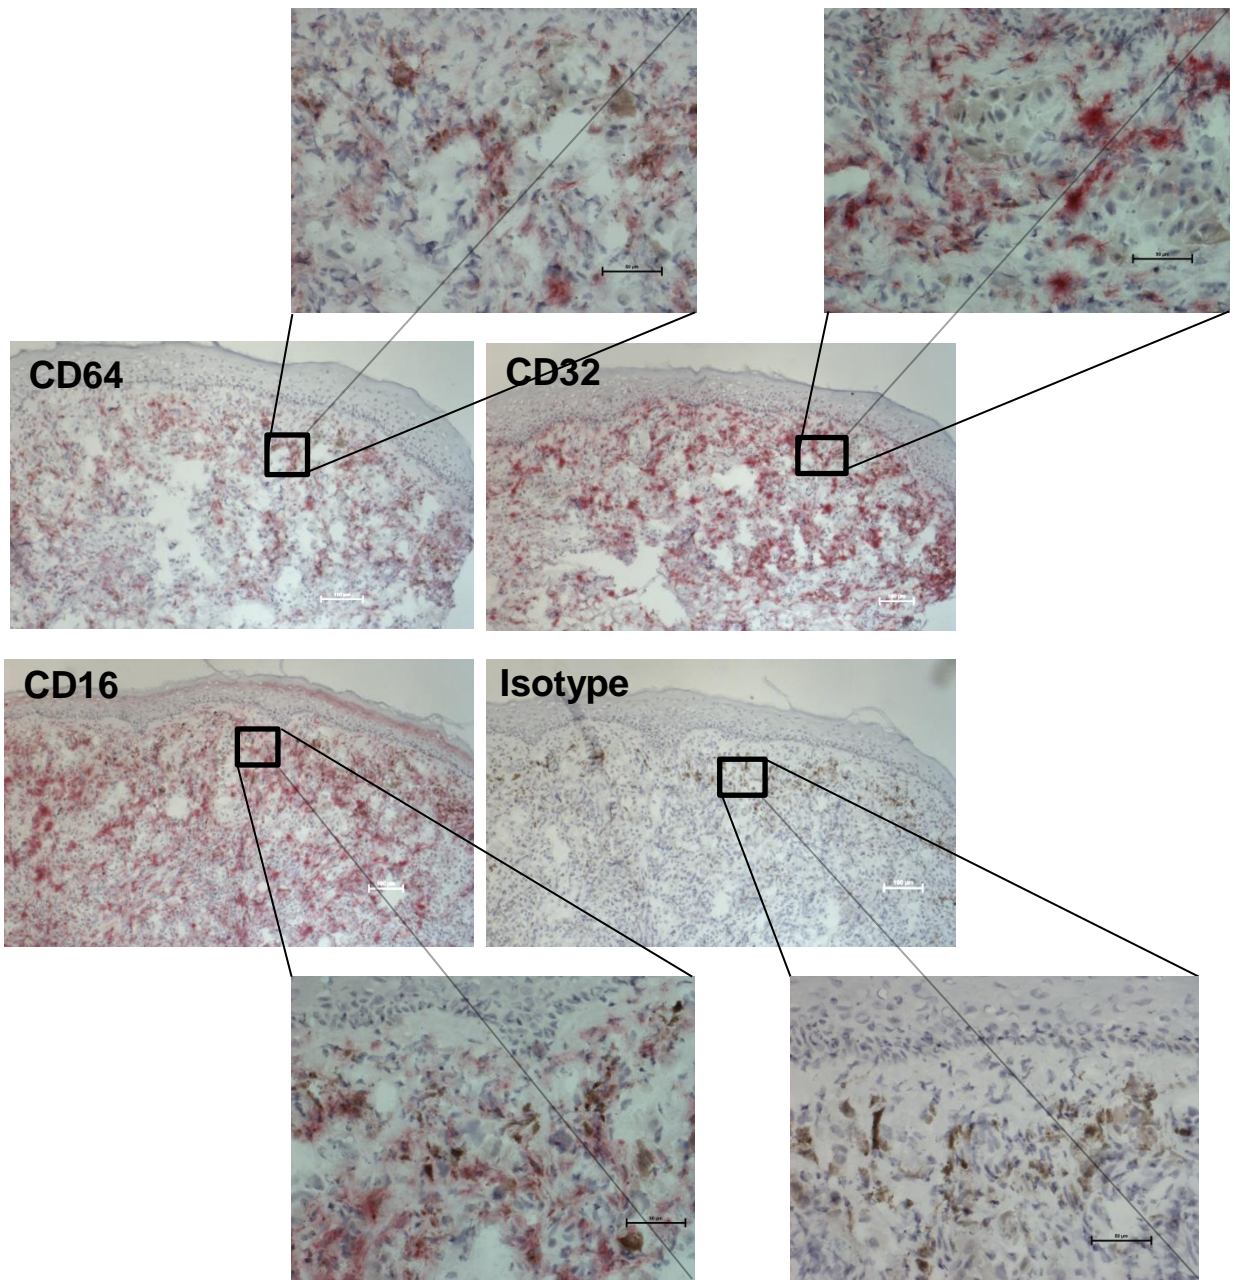

**Supplementary Figure 4:** Immunohistochemical analysis of FcγR distribution was conducted using fresh-frozen sections of human melanoma lesions and visualized using AP (in red). Representative images demonstrate all three families of FcγRs, i.e. FcγRI (CD64), FcγRII (CD32) and FcγRIII (CD16) widely expressed in melanoma lesions. Main images were captured at 10x magnification (scale bars: 100 μm); magnified images were captured at 20x (scale bars: 50 μm).

# Supplementary Figure 5

**A**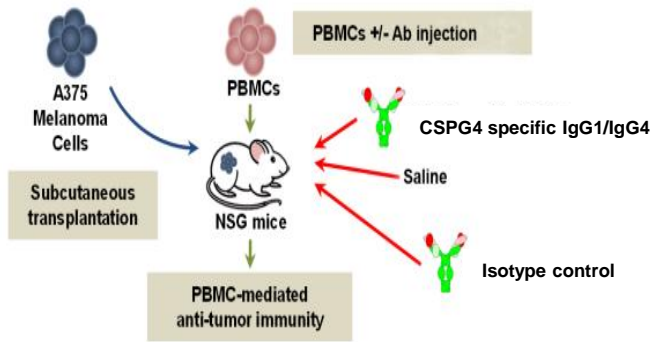**B**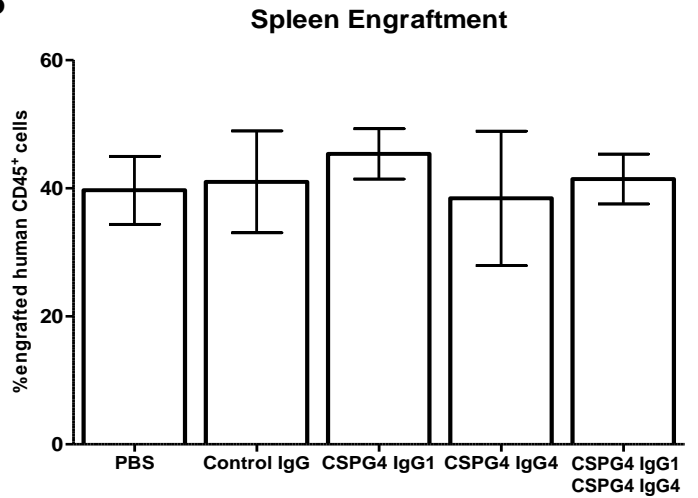**C**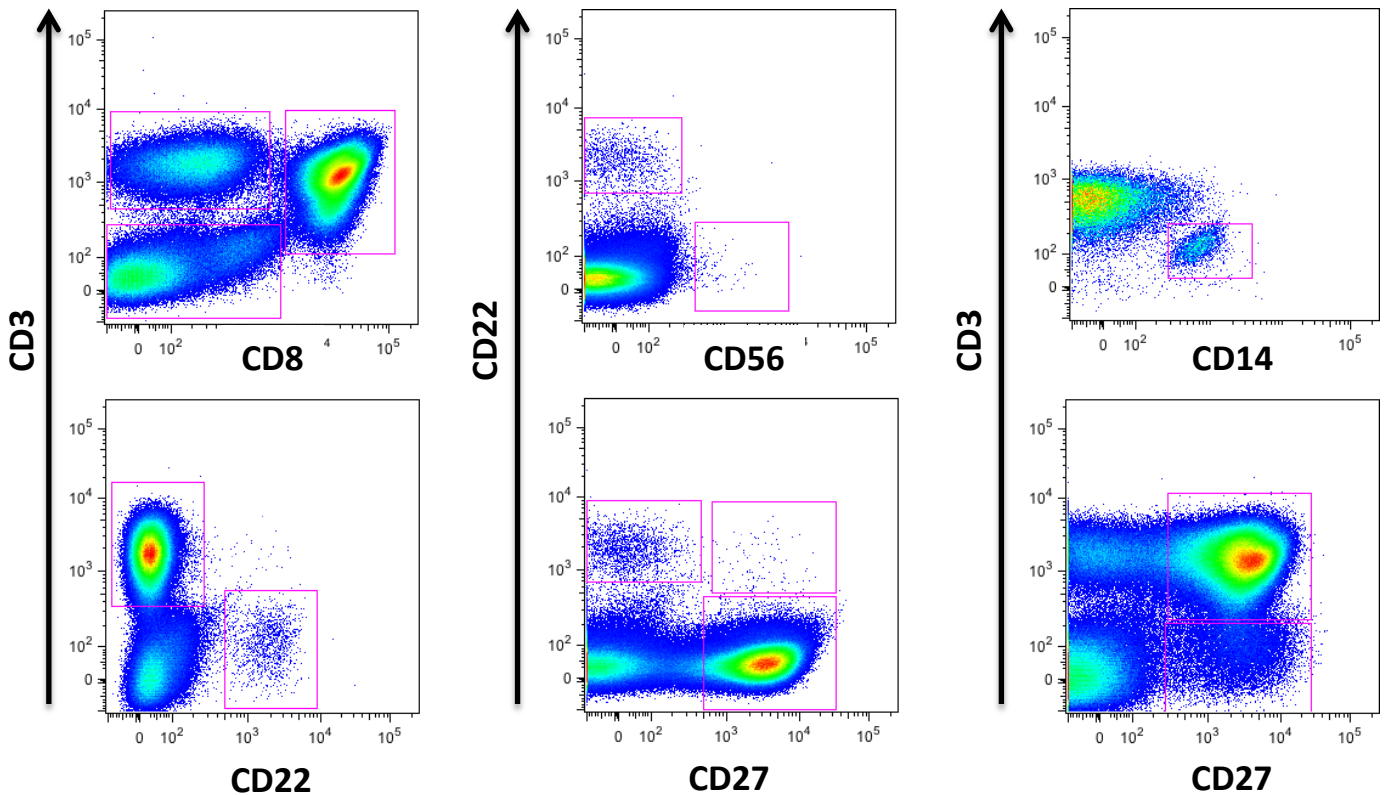

**Supplementary Figure 5: (A)** Design of in vivo model in NOD/scid/ IL-2R $\gamma$ <sup>-/-</sup> mice to determine antibody-mediated effector functions. **(B)** Engraftment of human CD45+ immune cells in mouse spleens, evaluated by flow cytometry showed no significant difference in human CD45+ engraftment across treatment groups. **(C)** Representative flow cytometric gating strategies to identify immune cell subsets within the human CD45+ mouse CD45- gates engrafted in mouse spleens.

## Supplementary Figure 6

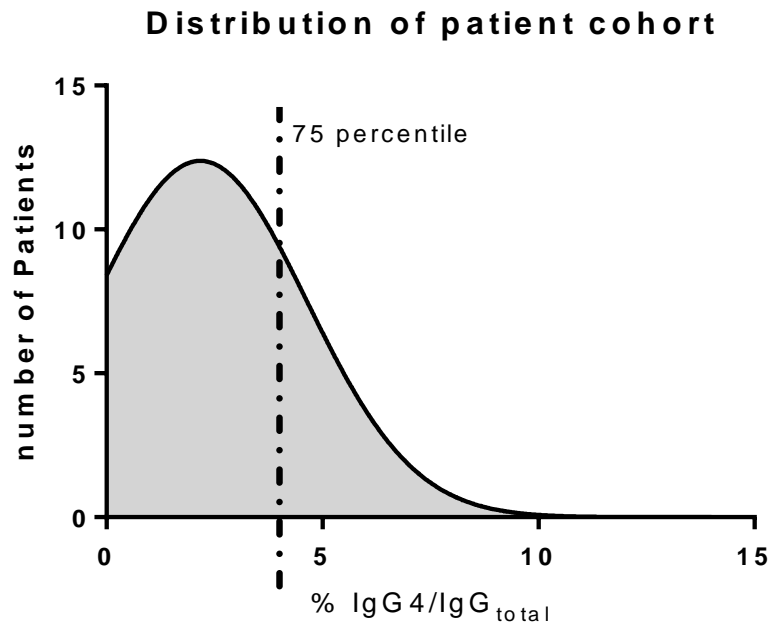

**Supplementary Figure 6:** Patient distribution based on % IgG4/IgG<sub>total</sub>; black dashed line indicates the 75 percentile, used as cut off point for cumulative survival analysis (Figure 8).

**Supplementary Table 1:** Clinical parameters and disease staging of peripheral blood donors used for ex vivo B cell cultures at the time of sampling (Figures 2 and 3).

| Patient ID | Gender | Age | Stage | TNM        |
|------------|--------|-----|-------|------------|
| M282       | F      | 43  | IB    | T2a;N0;M0  |
| M285       | M      | 82  | IIA   | T2b;N0;M0  |
| M286       | F      | 68  | IIB   | T4a;N0;M0  |
| M287       | F      | 62  | IIIA  | T2a;N1a;M0 |
| M338       | M      | 72  | IIIB  | Tx;N2c;M0  |
| M385       | M      | 67  | IIIC  | Tx;N3;M0   |
| M380       | M      | 41  | IIB   | T4a;N0;M0  |
| M381       | M      | 57  | IB    | T1b;N0;M0  |
| M386       | F      | 64  | IIIB  | Tx;N2c;M0  |
| M394       | M      | 56  | IIB   | T4a;N0;M0  |
| M396       | M      | 73  | IIC   | T4b;N0;M0  |
| M397       | F      | 70  | IIB   | T3b;N0;M0  |
| M401       | F      | 60  | IIIA  | T2a;N1a;M0 |
| M402       | M      | 50  | IIIB  | Tx;N1b;M0  |
| M404       | F      | 65  | IB    | T2b;N0;M0  |
| M405       | M      | 51  | IIC   | T4b;N0;M0  |
| M408       | F      | 71  | IB    | T1a;N0;M0  |
| M409       | F      | 78  | IIA   | T3a;N0;M0  |
| M430       | F      | 78  | IIC   | T4b;N0;M0  |
| M433       | F      | 48  | IIIB  | T3b;N2c;M0 |
| M435       | M      | 45  | IB    | T2a;N0;M0  |
| M437       | M      | 46  | IIA   | T3a;N0;M0  |
| M438       | F      | 62  | IIA   | T2b;N0;M0  |
| M443       | M      | 69  | IB    | T2a;N0;M0  |
| M318       | M      | 60  | IB    | T2a;N0;M0  |
| M320       | F      | 71  | IIB   | T3b;N0;M0  |
| M247       | F      | 37  | IV    | T3b;N0;M1c |
| M224       | F      | 76  | IIB   | T3b;N0;M0  |
| M223       | M      | 35  | IB    | T2a;N0;M0  |
